# Supplementary material for: A Small Molecule Inhibitor of the β-Catenin-TCF4 Interaction Suppresses Colorectal Cancer Growth In Vitro and In Vivo
Source: PubMed Central journal article supplement — eBioMedicine. 2017 Sep 27;25:22–31. doi: 10.1016/j.ebiom.2017.09.029 (PMC5704052; doi:10.1016/j.ebiom.2017.09.029), 2017-09-27
Supplement: mmc1.pdf [file mmc1.pdf]

## Supplemental Information

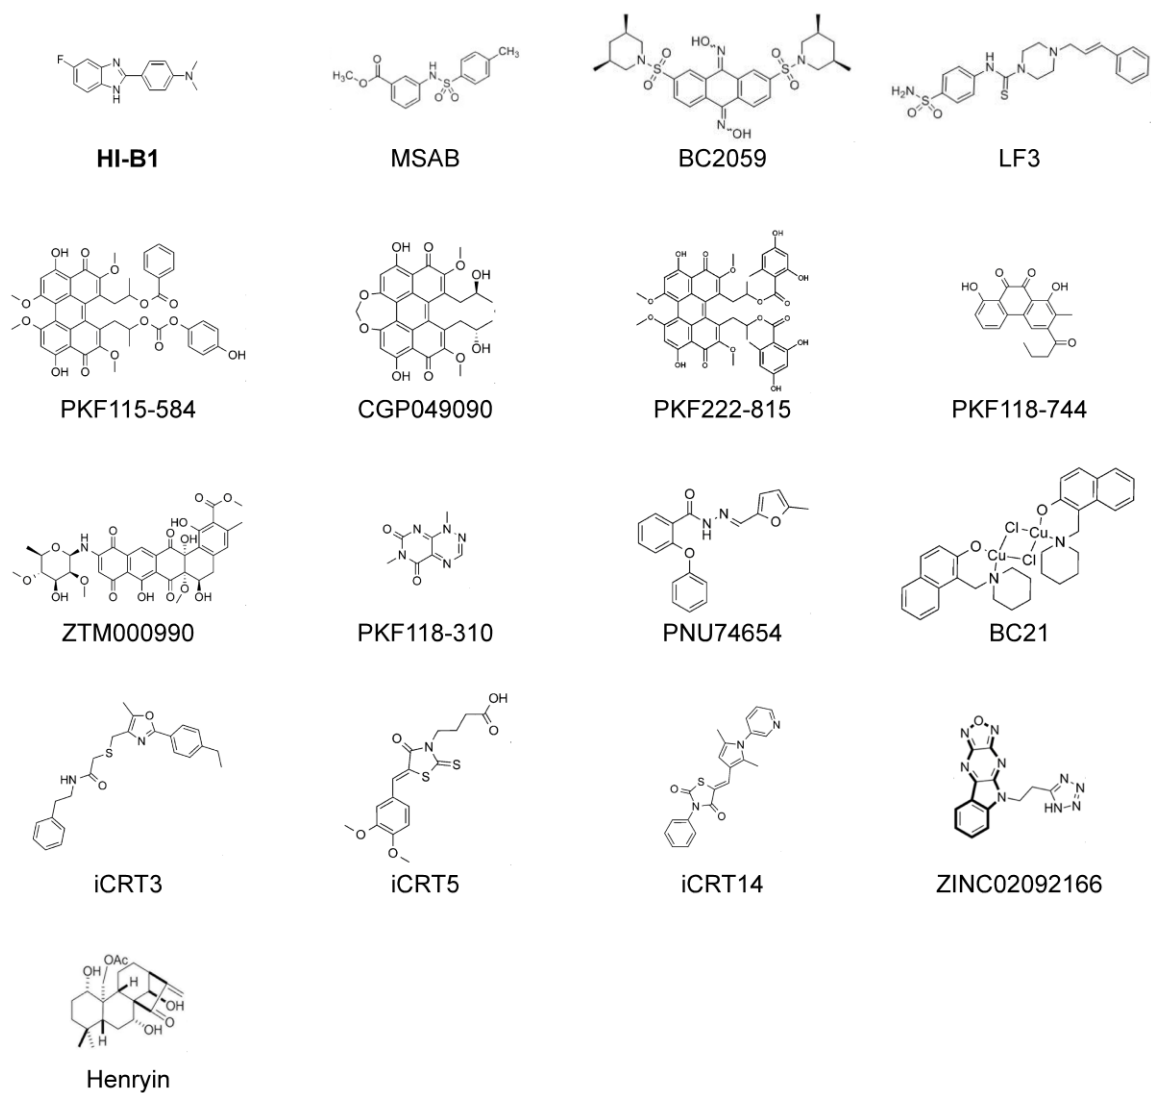

**Supplemental Figure 1.** Chemical structures of HI-B1 and  $\beta$ -catenin inhibitors previously reported. MSAB: Methyl 3-([(4-methylphenyl) sulfonyl] amino) benzoate.
